# Supplementary figures and images for: Antagonistic Interaction between Phosphinothricin and Nepeta rtanjensis Essential Oil Affected Ammonium Metabolism and Antioxidant Defense of Arabidopsis Grown In Vitro
Source: MDPI journal article supplement (doi:10.3390/plants10010142), 2021-01-12

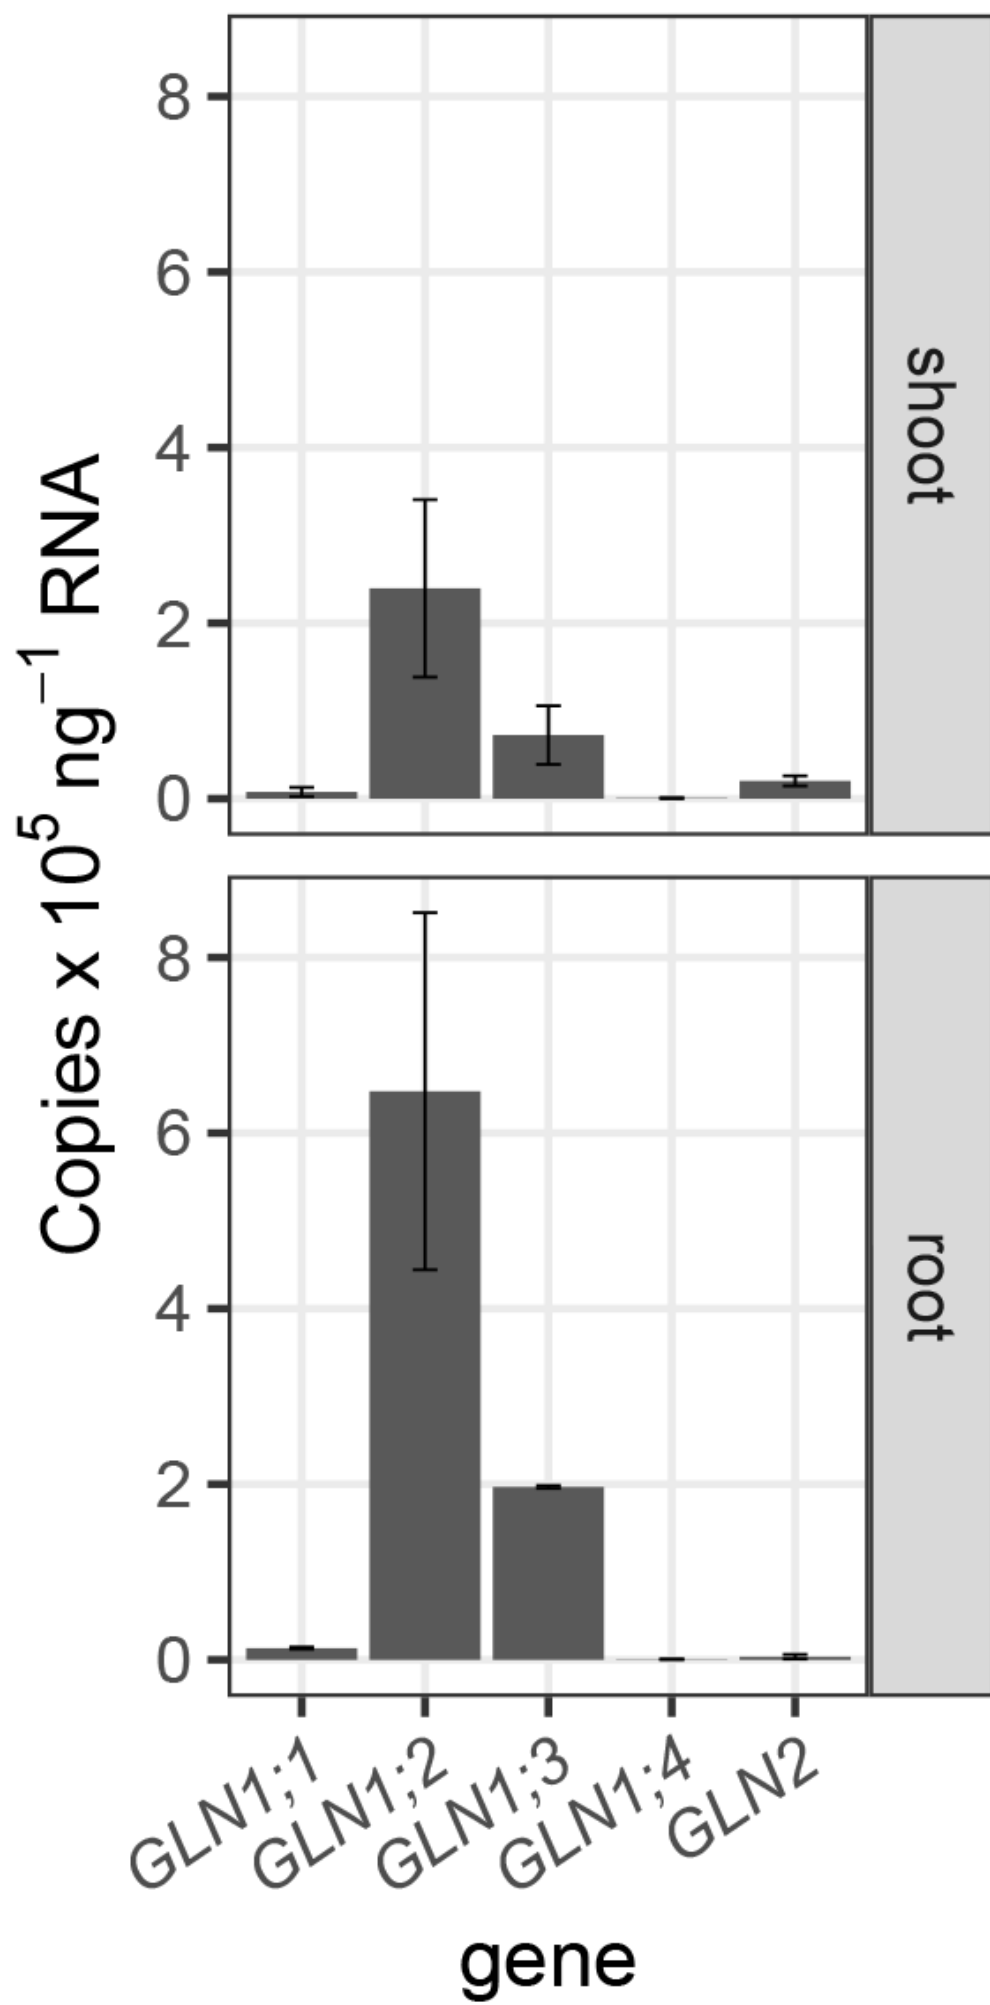

Supplement: s1 [file s1]
